# Supplementary material for: Fabrication of gradient vapor grown carbon fiber based polyurethane foam for shape memory driven microwave shielding
Source: Royal Society of Chemistry journal article supplement (doi:10.1039/c9ra00028c), 2019-01-01
Supplement: c9ra00028c1.pdf [file c9ra00028c1.pdf]

## Supplementary Information

### **Fabrication of gradient vapor grown carbon fiber based shape memory polyurethane foam for shape memory driven microwave shielding**

Yongjie Yan <sup>a</sup>, Hong Xia <sup>b</sup>, Yiping Qiu <sup>c</sup>, Zhenzhen Xu <sup>d</sup>, Qing-Qing Ni <sup>b, d\*</sup>

<sup>a</sup> *Interdisciplinary Graduate School of Science and Technology, Shinshu University,  
3-15-1 Tokida, Ueda, Nagano 386-8576, Japan*

<sup>b</sup> *Institute of Fiber Engineering, Shinshu University, 3-15-1 Tokida, Ueda, Nagano  
386-8576, Japan*

<sup>c</sup> *Department of High-tech Textiles, College of Textiles, Donghua University,  
Shanghai 201620, China*

<sup>d</sup> *College of Textile and Garments, Anhui Polytechnic University, Wuhu, Anhui  
241000, China*

\* Corresponding author. Tel: 81-(0)268-21-5438. E-mail: [niqq@shinshu-u.ac.jp](mailto:niqq@shinshu-u.ac.jp)

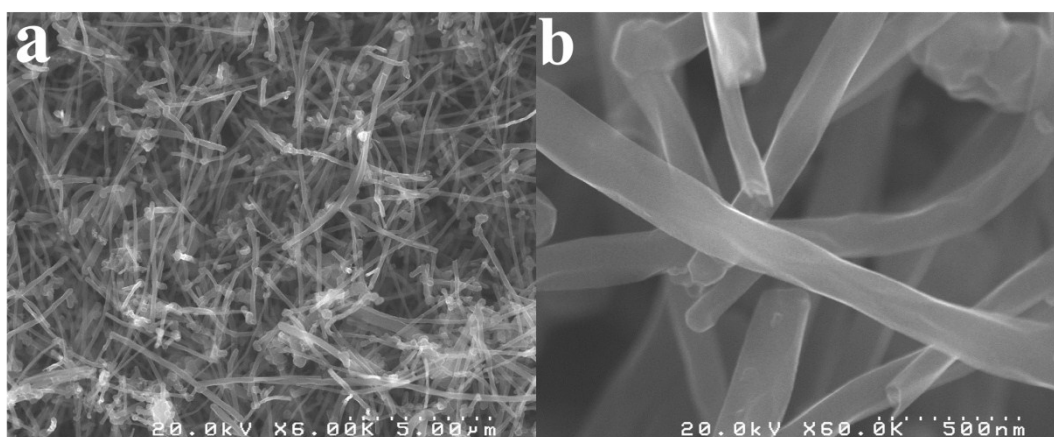

**Fig. S1.** Morphologies of VGCF under 5  $\mu\text{m}$  and 500 nm scale

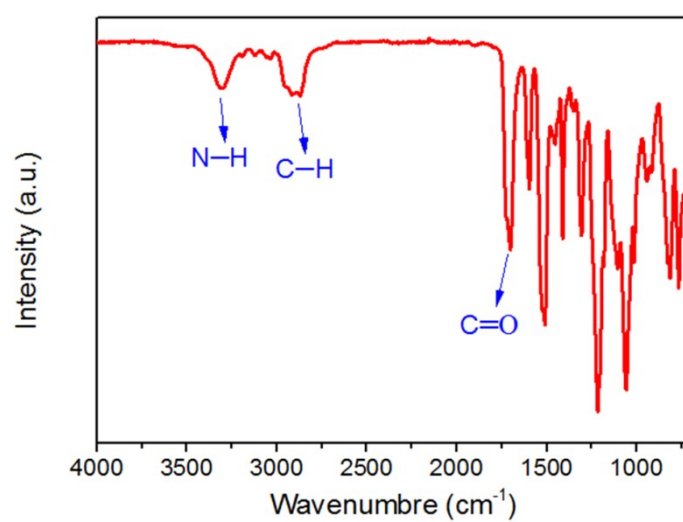

**Fig. S2.** FTIR spectrum of shape memory polyurethane (SMPU)
